# Supplementary material for: Nutritional Adequacy and Patient Perceptions of the Hospital Inpatient Haemodialysis Menu: A Mixed Methods Case Series
Source: MDPI journal article supplement (doi:10.3390/dietetics2030016), 2023-06-21
Supplement: s1 [file s1]

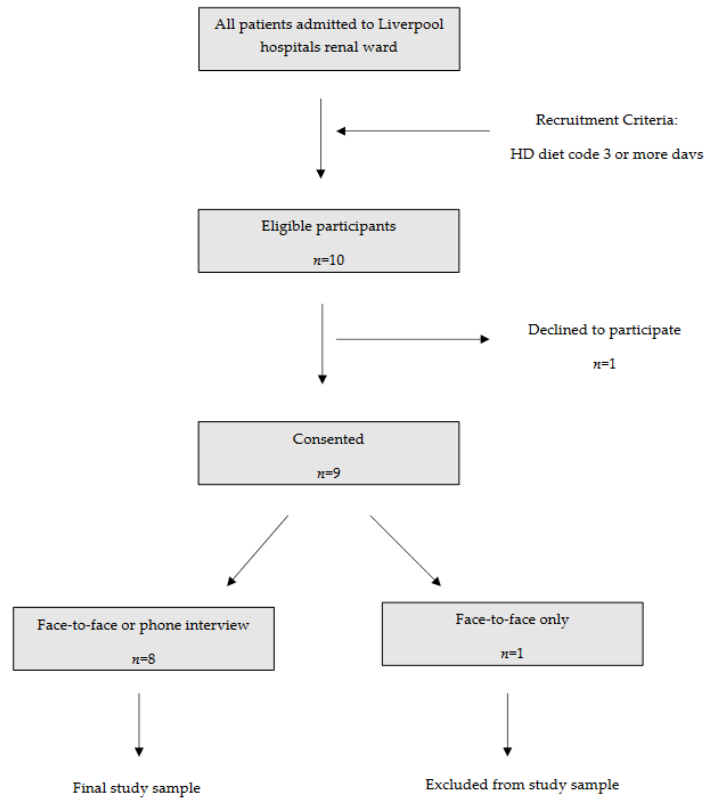

**Figure S1.** Study sample recruitment.

**Table S1.** Interview questions for qualitative phase of the study

| Interview question prompts: Qualitative Phase |                                                                                                                                                                                                                                                                                                                                                                                                                                                                                                                                 |
|-----------------------------------------------|---------------------------------------------------------------------------------------------------------------------------------------------------------------------------------------------------------------------------------------------------------------------------------------------------------------------------------------------------------------------------------------------------------------------------------------------------------------------------------------------------------------------------------|
| 1.                                            | What are the first thoughts that come to mind about the food that has been served to you? <ol style="list-style-type: none"><li>Have you had enough foods to choose from?</li><li>What do you think of the dessert options?</li><li>What do you think of the drink options?</li><li>What do you think of the mid meal options?</li><li>What do you think of the sandwich and salad options?</li><li>Are there any specific foods that you enjoy that you don't get from the haemodialysis diet menu here in hospital?</li></ol> |
| 2.                                            | Have you ever received other special diets in the hospital before? <ol style="list-style-type: none"><li>How did those meals compare to the current meals you have been receiving?</li><li>What did you like or dislike about the previous diet/s?</li></ol>                                                                                                                                                                                                                                                                    |
| 3.                                            | What are your thoughts on the haemodialysis diet served to you here in hospital? <ol style="list-style-type: none"><li>Do you think you get enough food?</li><li>Are there any food groups or nutrients that you feel you are missing out on? (Dairy, fruits, vegetables, meat/poultry, grains?)</li></ol>                                                                                                                                                                                                                      |
| 4.                                            | How do you think this diet has impacted your stay in hospital? <ol style="list-style-type: none"><li>How does this diet make you feel?</li><li>How has it affected your mood?</li><li>How has it affected your energy levels?</li></ol>                                                                                                                                                                                                                                                                                         |
| 5.                                            | Can you suggest any changes that could be made to the haemodialysis diet? <ol style="list-style-type: none"><li>Are there any foods you would like to see added?</li><li>Are there any foods or meals you would like removed?</li><li>Do you want more/less food?</li><li>Can you suggest any changes to desserts?</li><li>Can you suggest any changes to drinks?</li><li>Can you suggest any changes to snacks?</li><li>Can you suggest any changes to sandwiches?</li></ol>                                                   |
| 6.                                            | How would these changes you have suggested influence your stay in hospital? <ol style="list-style-type: none"><li>How would they make you feel?</li><li>Would they make you feel like eating more food?</li></ol>                                                                                                                                                                                                                                                                                                               |
| 7.                                            | Are there any other barriers preventing you from eating the food in hospital? <ol style="list-style-type: none"><li>Such as: difficulty feeding yourself, fasting, being off the ward for scans/tests, interruptions from staff?</li></ol>                                                                                                                                                                                                                                                                                      |
| 8.                                            | Have you had any food from outside the Hospital? <ol style="list-style-type: none"><li>If you had a different diet in hospital, would you still eat these additional foods?</li></ol>                                                                                                                                                                                                                                                                                                                                           |
| 9.                                            | Has going down to dialysis impacted meal times or the food you are served? <ol style="list-style-type: none"><li>Do you not receive your meal when you are at haemodialysis?</li><li>Is your meal on the ward when you return and can you eat it at this time?</li><li>What do you get given to eat in dialysis?</li></ol>                                                                                                                                                                                                      |
| 10.                                           | Do you follow a special diet at home? <ol style="list-style-type: none"><li>Can you tell me more about this?</li><li>Such as any fluid/salt/potassium/phosphate restrictions?</li></ol>                                                                                                                                                                                                                                                                                                                                         |
| 11.                                           | Have you seen a dietitian before? <ol style="list-style-type: none"><li>Can you tell me what they taught you?</li></ol>                                                                                                                                                                                                                                                                                                                                                                                                         |
